# Supplementary material
Source: Research Square preprint supplement (doi:10.21203/rs.3.rs-9483906/v1)
Supplement: Supplementary file 1 [file 1e7a7b5176bd9ef70e07cb1d.pdf]

# Scale Effects and Productivity Dynamics in Japan's Fisheries Sector

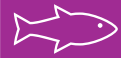

## 1. THE RESEARCH QUESTION & CONTEXT

### Integrated Japanese Fishery Sector

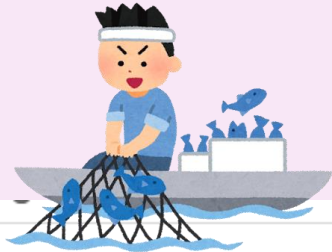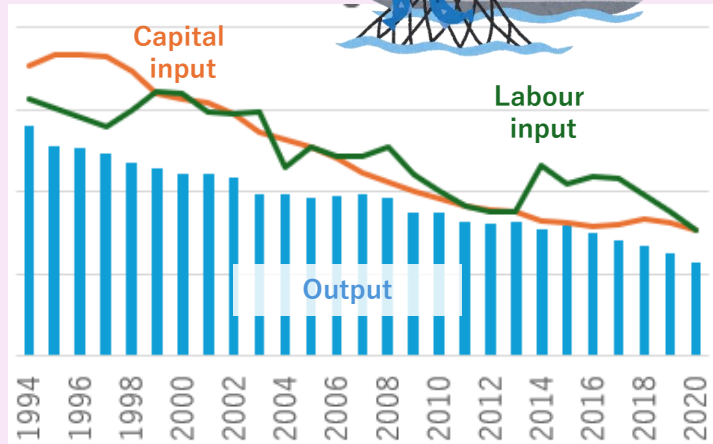

Prolonged Contraction in Industry Scale (1994-2020)

### RESEARCH QUESTION:

*Do changes in scale elasticity contribute to TFP dynamics in a contracting fishery sector?*

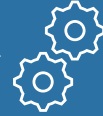

## 2. METHOD & EVIDENCE

### Combined Production & Input Demand Analysis

No Assumption of Constant Returns-to-Scale

#### Translog Production Function

Focus: Structural Characteristics

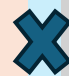

#### Differential Production Approach (DPA)

Focus: Behavioral Responses

### Scale elasticity shifted from DRS to IRS

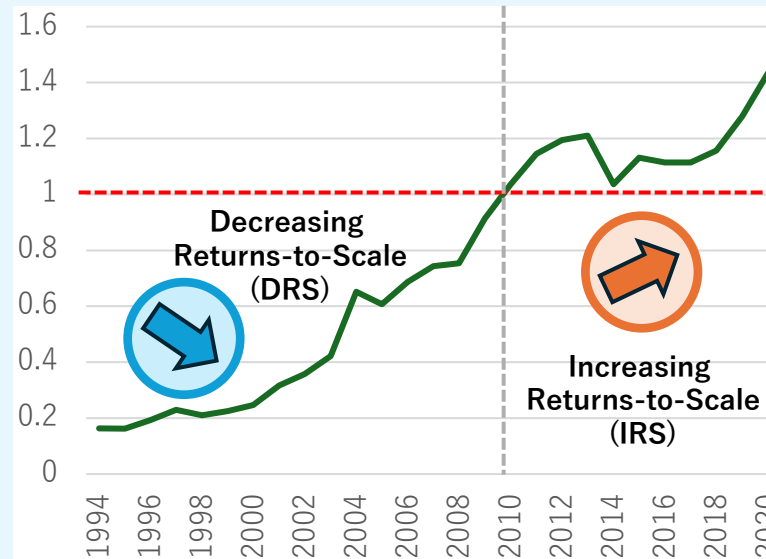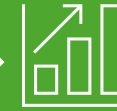

## 3. KEY FINDINGS & POLICY IMPLICATIONS

### Input use continued to decline...

→ Contraction Trap (**Negative scale effects**)

| Pre-2010                                            | Post-2010                                             |
|-----------------------------------------------------|-------------------------------------------------------|
| DRS mitigated TFP loss caused by scale contraction. | IRS exacerbated TFP loss caused by scale contraction. |

### Total Factor Productivity (TFP) Dynamics

- TFP growth remains largely negative.
- Labour productivity is more strongly associated with TFP than capital productivity.

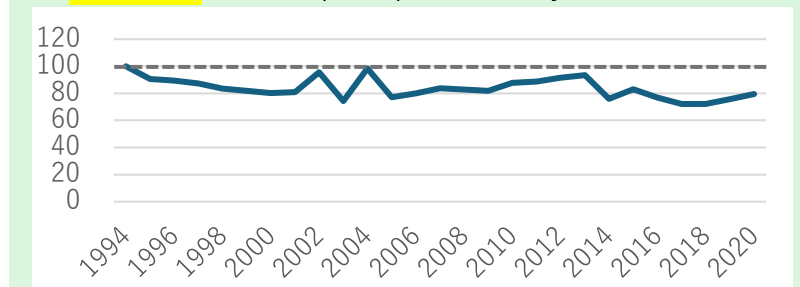

### POLICY IMPLICATIONS

- Maintaining adequate scale is key to realizing positive scale effects.
- Prioritize labour productivity and working conditions alongside capital investment.
